# Supplementary material for: Challenges and strategies for management and conservation of water resources and freshwater biodiversity in the Lake Victoria Basin
Source: Frontiers journal article supplement (doi:10.3389/fcosc.2025.1544429), 2025-06-27
Supplement: Table_1.docx [file Table_1.docx]

**List of reviewed papers on threats and their suggested management options in the Lake Victoria basin**

1. Abong'o, D. A. (2009). *Occurrence, distribution and environmental impact of organochlorine pesticide resedues in the Lake Victoria catchment: a case study of River Nyando drainage basin of Winam Gulf in Kenya* (Doctoral dissertation, University of Nairobi).
2. Achieng, A. O., Masese, F. O., Coffey, T. J., Raburu, P. O., Agembe, S. W., Febria, C. M., & Kaunda-Arara, B. (2021). Assessment of the ecological health of Afrotropical rivers using fish assemblages: A case study of selected rivers in the Lake Victoria Basin, Kenya. *Frontiers in Water*, *2*, 620704.
3. Achieng’, A. O., Raburu, P. O., Okinyi, L., & Wanjala, S. (2014). Use of macrophytes in the bioassessment of the health of King’wal Wetland, Lake Victoria Basin, Kenya. *Aquatic Ecosystem Health & Management*, *17*(2), 129-136.
4. Akurut, M., Niwagaba, C. B., & Willems, P. (2017). Long-term variations of water quality in the Inner Murchison Bay, Lake Victoria. *Environmental monitoring and assessment*, *189*, 1-17.
5. Aloo, P. A. (2003). Biological diversity of the Yala Swamp lakes, with special emphasis on fish species composition, in relation to changes in the Lake Victoria Basin (Kenya): threats and conservation measures. *Biodiversity & Conservation*, *12*, 905-920.
6. Aloo, P., Ojwang, W., Omondi, R., Njiru, J. M., & Oyugi, D. (2013). A review of the impacts of invasive aquatic weeds on the biodiversity of some tropical water bodies with special reference to Lake Victoria (Kenya). *Biodiversity journal*, *4*(4), 471-482.
7. Anaba, L. A., Banadda, N., Kiggundu, N., Wanyama, J., Engel, B., & Moriasi, D. (2017). Application of SWAT to assess the effects of land use change in the Murchison Bay catchment in Uganda. *Computational Water, Energy, and Environmental Engineering*, *6*(01), 24.
8. Aura, C. M., Nyamweya, C. S., Owiti, H., Odoli, C., Musa, S., Njiru, J. M., ... & Masese, F. O. (2021). Citizen science for bio-indication: development of a community-based index of ecosystem integrity for assessing the status of Afrotropical riverine ecosystems. *Frontiers in Water*, *2*, 609215.
9. Aura, C. M., Odoli, C., Nyamweya, C. S., Njiru, J. M., Musa, S., Miruka, J. B., ... & Mbaru, E. K. (2020). Application of phytoplankton community structure for ranking the major riverine catchments influencing the pollution status of a lake basin. *Lakes & Reservoirs: Research & Management*, *25*(1), 3-17.
10. Aura, C. M., Raburu, P. O., & Herrmann, J. (2010). A preliminary macroinvertebrate Index of Biotic Integrity for bioassessment of the Kipkaren and Sosiani Rivers, Nzoia River basin, Kenya. *Lakes & Reservoirs: Research & Management*, *15*(2), 119-128.
11. Awange, J. L. (2006). *Lake Victoria: ecology, resources, environment*. Springer Science & Business Media.
12. Baguma, G., Musasizi, A., Twinomuhwezi, H., Gonzaga, A., Nakiguli, C. K., Onen, P., ... & Omara, T. (2022). Heavy metal contamination of sediments from an exoreic African great lakes’ shores (Port Bell, Lake Victoria), Uganda. *Pollutants*, *2*(4), 407-421.
13. Balirwa, J. S. (2007). Ecological, environmental and socioeconomic aspects of the Lake Victoria's introduced Nile perch fishery in relation to the native fisheries and the species culture potential: lessons to learn. *African Journal of Ecology*, *45*(2), 120-129.
14. Balirwa, J. S., Chapman, C. A., Chapman, L. J., Cowx, I. G., Geheb, K., Kaufman, L. E. S., ... & Witte, F. (2003). Biodiversity and fishery sustainability in the Lake Victoria basin: an unexpected marriage?. *BioScience*, *53*(8), 703-715.
15. Balirwa, J., Chapman, C. A., Chapman, L. J., Geheb, K., Lowe-McConnell, R., Seehausen, O., ... & Witte, F. (2005). The role of conservation in biodiversity and fisheries sustainability in the Lake Victoria Basin. *Lake Victoria*, 703-715.
16. Banadda, E. N., Kansiime, F., Kigobe, M., Kizza, M., & Nhapi, I. (2009). Landuse-based nonpoint source pollution: a threat to water quality in Murchison Bay, Uganda. *Water Policy*, *11*(S1), 94-105.
17. Banadda, N., Nhapi, I., & Wali, U. G. (2011). Determining and modeling the dispersion of non point source pollutants in Lake Victoria: A case study of Gaba Landing site in Uganda. *African Journal of Environmental Science and Technology*, *5*(3), 178-185.
18. Bootsma, H. A., & Hecky, R. E. (1993). Conservation of the African Great Lakes: a limnological perspective. *Conservation biology*, *7*(3), 644-656.
19. Campbell, L., Dixon, D. G., & Hecky, R. E. (2003). A review of mercury in Lake Victoria, East Africa: implications for human and ecosystem health. *Journal of Toxicology and Environmental Health, Part B*, *6*(4), 325-356.
20. Chapman, L. J., Chapman, C. A., Kaufman, L., Witte, F., & Balirwa, J. (2008). Biodiversity conservation in African inland waters: lessons of the Lake Victoria region. *Internationale Vereinigung für theoretische und angewandte Limnologie: Verhandlungen*, *30*(1), 16-34.
21. Chapman, L. J., Nyboer, E. A., & Fugère, V. (2022). Fish response to environmental stressors in the Lake Victoria Basin Ecoregion. In *Fish physiology* (Vol. 39, pp. 273-324). Academic Press.
22. Cohen, A. S., Kaufman, L., & Ogutu-Ohwayo, R. (2019). Anthropogenic threats, impacts and conservation strategies in the African Great Lakes: a review. *Limnology, Climatology and Paleoclimatology of the east African Lakes*, 575-624.
23. Cristiano, W., Giacoma, C., Carere, M., & Mancini, L. (2021). Chemical pollution as a driver of biodiversity loss and potential deterioration of ecosystem services in Eastern Africa: A critical review. *South African Journal of Science*, *117*(9-10).
24. Dalahmeh, S., Björnberg, E., Elenström, A. K., Niwagaba, C. B., & Komakech, A. J. (2020). Pharmaceutical pollution of water resources in Nakivubo wetlands and Lake Victoria, Kampala, Uganda. *Science of The Total Environment*, *710*, 136347.
25. Darwall, W., Smith, K., Allen, D., Seddon, M., Reid, G. M., Clausnitzer, V., & Kalkman, V. J. (2009). Freshwater biodiversity: a hidden resource under threat. *Wildlife in a changing world–An Analysis of the 2008 IUCN Red List of Threatened Species*, *43*.
26. Defersha, M. B., Melesse, A. M., & McClain, M. E. (2012). Watershed scale application of WEPP and EROSION 3D models for assessment of potential sediment source areas and runoff flux in the Mara River Basin, Kenya. *Catena*, *95*, 63-72.
27. Downing, A. S., Van Nes, E. H., Balirwa, J. S., Beuving, J., Bwathondi, P. O., Chapman, L. J., ... & Mooij, W. M. (2014). Coupled human and natural system dynamics as key to the sustainability of Lake Victoria’s ecosystem services. *Ecology and Society*, *19*(4).
28. Dutton, C. L., Subalusky, A. L., Anisfeld, S. C., Njoroge, L., Rosi, E. J., & Post, D. M. (2018). The influence of a semi-arid sub-catchment on suspended sediments in the Mara River, Kenya. *PloS one*, *13*(2), e0192828.
29. Dutton, C. L., Subalusky, A. L., Hill, T. D., Aleman, J. C., Rosi, E. J., Onyango, K. B., ... & Post, D. M. (2019). A 2000-year sediment record reveals rapidly changing sedimentation and land use since the 1960s in the Upper Mara-Serengeti Ecosystem. *Science of the Total Environment*, *664*, 148-160.
30. Egessa, R., Nankabirwa, A., Ocaya, H., & Pabire, W. G. (2020). Microplastic pollution in surface water of Lake Victoria. *Science of the Total Environment*, *741*, 140201.
31. Garg, I. (2022). Tanzania: Development of Environmental Management Strategy Towards Sustaining Ecological Integrity of Lake Victoria. *Centre for Science and Environment, New*.
32. Garg, I., Yadav, N. N., Basu, D. D., Yadava, H., Mafwenga, E. G., Jangu, M. H., ... & Chacha, B. F. (2023). Lake Victoria: Roadmap for Management of Water Quality in Mwanza City, Tanzania. *Centre for Science and Environment, New Delhi*.
33. Getirana, A., Jung, H. C., Van Den Hoek, J., & Ndehedehe, C. E. (2020). Hydropower dam operation strongly controls Lake Victoria's freshwater storage variability. *Science of The Total Environment*, *726*, 138343.
34. Gichuki, J., Omondi, R., Boera, P., Okorut, T., Matano, A. S., Jembe, T., & Ofulla, A. (2012). Water hyacinth Eichhornia crassipes (Mart.) Solms‐Laubach dynamics and succession in the Nyanza gulf of Lake Victoria (East Africa): Implications for water quality and biodiversity conservation. *The Scientific World Journal*, *2012*(1), 106429.
35. Gikuma-Njuru, P., Rutagemwa, D. K., Mugidde, R., Hecky, R. E., Mwebaza-Ndawula, L., Mwirigi, P. M., ... & Kinobe, J. (2005). Eutrophication of the Lake Victoria ecosystem.
36. Githaiga, K. B., Njuguna, S. M., Gituru, R. W., & Yan, X. (2021). Water quality assessment, multivariate analysis and human health risks of heavy metals in eight major lakes in Kenya. *Journal of Environmental Management*, *297*, 113410.
37. Glaser, S. M., Hendrix, C. S., Franck, B., Wedig, K., & Kaufman, L. (2019). Armed conflict and fisheries in the Lake Victoria basin. *Ecology and Society*, *24*(1).
38. Gomes, M., Ralph, T. J., Helander, C., & Humphries, M. S. (2023). Landscape connectivity dynamics of the transboundary Mara River catchment, East Africa, and implications for river and wetland response in a globally important conservation region. *Catena*, *228*, 107148.
39. Gophen, M., Ochumba, P. B., & Kaufman, L. S. (1995). Some aspects of perturbation in the structure and biodiversity of the ecosystem of Lake Victoria (East Africa). *Aquatic Living Resources*, *8*(1), 27-41.
40. Guzha, A. C., Rufino, M. C., Okoth, S., Jacobs, S., & Nóbrega, R. L. (2018). Impacts of land use and land cover change on surface runoff, discharge and low flows: Evidence from East Africa. *Journal of Hydrology: Regional Studies*, *15*, 49-67.
41. Hampton, S. E., McGowan, S., Ozersky, T., Virdis, S. G., Vu, T. T., Spanbauer, T. L., ... & Fritz, S. C. (2018). Recent ecological change in ancient lakes. *Limnology and Oceanography*, *63*(5), 2277-2304.
42. Hecky, R. E. (1993). The eutrophication of lake Victoria. *Internationale Vereinigung für theoretische und angewandte Limnologie: Verhandlungen*, *25*(1), 39-48.
43. Hecky, R. E., Mugidde, R., Ramlal, P. S., Talbot, M. R., & Kling, G. W. (2010). Multiple stressors cause rapid ecosystem change in Lake Victoria. *Freshwater Biology*, *55*, 19-42.
44. Jacobs, S. R., & Breuer, L. (2024). The state of nitrogen in rivers and streams across sub-Saharan Africa. *Science of the Total Environment*, 176611.
45. Jacobs, S. R., Breuer, L., Butterbach-Bahl, K., Pelster, D. E., & Rufino, M. C. (2017). Land use affects total dissolved nitrogen and nitrate concentrations in tropical montane streams in Kenya. *Science of the Total Environment*, *603*, 519-532.
46. Juma, D. W., Wang, H., & Li, F. (2014). Impacts of population growth and economic development on water quality of a lake: case study of Lake Victoria Kenya water. *Environmental Science and Pollution Research*, *21*, 5737-5746.
47. Kabenge, M., Wang, H., & Li, F. (2016). Urban eutrophication and its spurring conditions in the Murchison Bay of Lake Victoria. *Environmental Science and Pollution Research*, *23*, 234-241.
48. Kairu, J. K. (2001). Wetland use and impact on Lake Victoria, Kenya region. *Lakes & Reservoirs: Research & Management*, *6*(2), 117-125.
49. Kalacska, M., Arroyo-Mora, J. P., Lucanus, O., & Kishe-Machumu, M. A. (2017). Land cover, land use, and climate change impacts on endemic cichlid habitats in northern Tanzania. *Remote Sensing*, *9*(6), 623.
50. Kajuni, A. R., Kijazi, A. S., Mtani, B. F., & Monjare, J. F. (2024). Land cover changes between 2010 and 2020 in Lake Victoria basin in Tanzania. In *The Nile River System, Africa* (pp. 133-146). Elsevier.
51. Kashindye, B. B., Nsinda, P., Kayanda, R., Ngupula, G. W., Mashafi, C. A., & Ezekiel, C. N. (2015). Environmental impacts of cage culture in Lake Victoria: the case of Shirati Bay-Sota, Tanzania. *SpringerPlus*, *4*, 1-15.
52. Kasozi, G. N., Kiremire, B. T., Bugenyi, F. W. B., Kirsch, N. H., & Nkedi‐Kizza, P. (2006). Organochlorine residues in fish and water samples from Lake Victoria, Uganda. *Journal of environmental quality*, *35*(2), 584-589.
53. Kassenga, G. R. (1997). A descriptive assessment of the wetlands of the Lake Victoria basin in Tanzania. *Resources, Conservation and Recycling*, *20*(2), 127-141.
54. Katusiime, J., Schütt, B., & Mutai, N. (2023). The relationship of land tenure, land use and land cover changes in Lake Victoria basin. *Land Use Policy*, *126*, 106542.
55. Kayombo, S., & Jorgensen, S. E. (2006). Lake Victoria. *Experience and lessons learned brief*, 431-446.
56. Khisa, P. S., Uhlenbrook, S., van Dam, A. A., Wenninger, J., Van Griensven, A., & Abira, M. (2013). Ecohydrological characterization of the Nyando wetland, Lake Victoria, Kenya: a state of system (SoS) analysis. *African Journal of Environmental Science and Technology*, *7*(6), 417-434.
57. Kiggundu, N., Abugri Anaba, L., Banadda, N., Wanyama, J., & Kabenge, I. (2018). Assessing land use and land cover changes in the Murchison Bay catchment of Lake Victoria basin in Uganda.
58. Kilonzo, F., Masese, F. O., Van Griensven, A., Bauwens, W., Obando, J., & Lens, P. N. (2014). Spatial–temporal variability in water quality and macro-invertebrate assemblages in the Upper Mara River basin, Kenya. *Physics and Chemistry of the Earth, Parts A/B/C*, *67*, 93-104.
59. Kimirei, I. A., Semba, M., Mwakosya, C., Mgaya, Y. D., & Mahongo, S. B. (2017). Environmental changes in the Tanzanian part of Lake Victoria. *Lake Victoria fisheries resources: Research and management in Tanzania*, 37-59.
60. Kimwaga, R. J., Bukirwa, F., Banadda, N., Wali, U. G., Nhapi, I., & Mashauri, D. A. (2012). Modelling the impact of land use changes on sediment loading into lake Victoria using SWAT model: A Case of Simiyu Catchment Tanzania. *Open Environ Eng J*, *5*, 66-76.
61. Kimwaga, R. J., Mashauri, D. A., Bukirwa, F., Banadda, N., Wali, U. G., & Nhapi, I. (2012). Development of best management practices for controlling the non-point sources of pollution around Lake Victoria using SWAT Model: A Case of Simiyu catchment Tanzania. *Open Environ. Eng. J*, *5*, 77-83.
62. Kimwaga, R. J., Mashauri, D. A., Bukirwa, F., Banadda, N., Wali, U. G., Nhapi, I., & Nansubuga, I. (2011). Modelling of non-point source pollution around lake victoria using swat model: a case of simiyu catchment tanzania. *Open Environ. Eng. J*, *4*, 112-123.
63. Kinaro, Z. (2008). Wetland Conversion to large-scale agricultural production; implications on the livelihoods of rural communities, Yala Swamp, Lake Victoria basin, Kenya.
64. Kingsford, R. T., Basset, A., & Jackson, L. (2016). Wetlands: conservation's poor cousins. *Aquatic Conservation: Marine and Freshwater Ecosystems*, *26*(5), 892-916.
65. Kisamo, D. S. (2003). Environmental hazards associated with heavy metals in lake Victoria Basin (East Africa), Tanzania. *Africa Newsletter on Occupational Health and Safety*, *13*, 67-69.
66. Kishe, M. A. (2004). Physical and chemical characteristics of water in selected locations in Lake Victoria, Tanzania. *Tanzania Journal of Science*, *30*(2), 65-72.
67. Kiwango, Y. A., & Wolanski, E. (2008). Papyrus wetlands, nutrients balance, fisheries collapse, food security, and Lake Victoria level decline in 2000–2006. *Wetlands Ecology and Management*, *16*, 89-96.
68. Kobingi, N., Raburu, P. O., Masese, F. O., & Gichuki, J. (2009). Assessment of pollution impacts on the ecological integrity of the Kisian and Kisat rivers in Lake Victoria drainage basin, Kenya. *African Journal of Environmental Science and Technology*, *3*(4), 097-107.
69. Kolding, J., Zwieten, P. V., Mkumbo, O., Silsbe, G., & Hecky, R. (2008). Are the Lake Victoria fisheries threatened by exploitation or eutrophication? Towards an ecosystem-based approach to management. In *The ecosystem approach to fisheries* (pp. 309-350). Wallingford UK: CABI.
70. Kulekana, J. J. (2004). Levels of nitrate and phosphate in some satellite lakes within the Lake Victoria basin, Tanzania. *Tanzania Journal of Science*, *30*(1), 1-10.
71. Kundu, R., Aura, C. M., Nyamweya, C., Agembe, S., Sitoki, L., Lung'ayia, H. B., ... & Werimo, K. (2017). Changes in pollution indicators in Lake Victoria, Kenya and their implications for lake and catchment management. *Lakes & Reservoirs: Research & Management*, *22*(3), 199-214.
72. L.J. Chapman, J. Balirwa, F.W.B. Bugenyi, C. Chapman, T.L. Crisman 2001. Wetlands of East Africa: biodiversity, exploitation and policy perspectives. B. Gopal, W.J. Junk, J.A. Davis (Eds.), Biodiversity in Wetlands: Assessment, Function and Conservation, vol. 2, Backhuys Publishers (2001), pp. 101-131
73. Lange, C. N., Kristensen, T. K., & Madsen, H. (2013). Gastropod diversity, distribution and abundance in habitats with and without anthropogenic disturbances in Lake Victoria, Kenya. *African Journal of Aquatic Science*, *38*(3), 295-304.
74. Liu, Y., Wu, G., Fan, X., Gan, G., Wang, W., & Liu, Y. (2022). Hydrological impacts of land use/cover changes in the Lake Victoria basin. *Ecological Indicators*, *145*, 109580.
75. Lubanga, H. L., Manyala, J. O., Sitati, A., Yegon, M. J., & Masese, F. O. (2021). Spatial variability in water quality and macroinvertebrate assemblages across a disturbance gradient in the Mara River Basin, Kenya. *Ecohydrology & Hydrobiology*, *21*(4), 718-730.
76. Lung'Ayia, H., Sitoki, L., & Kenyanya, M. (2001). The nutrient enrichment of Lake Victoria (Kenyan waters). *Hydrobiologia*, *458*, 75-82.
77. Machiwa, P. K. (2003). Water quality management and sustainability: the experience of Lake Victoria Environmental Management Project (LVEMP)––Tanzania. *Physics and Chemistry of the Earth, Parts A/B/C*, *28*(20-27), 1111-1115.
78. Mailu, A. M. (2001). Preliminary assessment of the cocial, economic and environmental impacts of Water Hyacinth in Lake Victoria basin and status of control.
79. Maitima, J. M., Olson, J. M., Mugatha, S. M., Mugisha, S., & Mutie, I. T. (2010). Land use changes, impacts and options for sustaining productivity and livelihoods in the basin of lake Victoria. *Journal of sustainable development in Africa*, *12*(3), 1520-5509.
80. Makaka, R. R., Misi, S., Masocha, M., & Kimwaga, R. (2021). Spatial and temporal variation of selected water quality parameters in the Tanzanian side of Lake Victoria. *Tanzania Journal of Engineering and Technology*, *40*(2), 1-23.
81. Mango, Liya M., et al. "Land use and climate change impacts on the hydrology of the upper Mara River Basin, Kenya: results of a modeling study to support better resource management." *Hydrology and earth system sciences* 15.7 (2011): 2245-2258.
82. Marshall, B. E. (2018). Guilty as charged: Nile perch was the cause of the haplochromine decline in Lake Victoria. *Canadian Journal of Fisheries and Aquatic Sciences*, *75*(9), 1542-1559.
83. Marshall, B. E., Ezekiel, C. N., Gichuki, J., Mkumbo, O. C., Sitoki, L., & Wanda, F. (2013). Has climate change disrupted stratification patterns in Lake Victoria, East Africa?. *African Journal of Aquatic Science*, *38*(3), 249-253.
84. Masasi, A., Gobolo, A., & Rwiza, I. (2018). Impacts of human activities on biodiversity of the Simiyu wetland, Tanzania. *African Journal of Tropical Hydrobiology and Fisheries*, *16*(2), 108-114.
85. Masese, F. O., & McClain, M. E. (2012). Trophic resources and emergent food web attributes in rivers of the Lake Victoria Basin: a review with reference to anthropogenic influences. *Ecohydrology*, *5*(6), 685-707.
86. Masese, F. O., Achieng, O. A., Raburu, P. O., Lawrence, T., Ives, J. T., Nyamweya, C., & Kaunda-Arara, B. (2020). Patterns of diversity and distribution of riverine fishes of the Lake Victoria basin, Kenya. *International Review of Hydrobiology*, *105*(5-6), 171-184.
87. Masese, F. O., Raburu, P. O., & Muchiri, M. (2009a). A preliminary benthic macroinvertebrate index of biotic integrity (B-IBI) for monitoring the Moiben River, Lake Victoria Basin, Kenya. *African Journal of Aquatic Science*, *34*(1), 1-14.
88. Masese, F. O., Muchiri, M., & Raburu, P. O. (2009b). Macroinvertebrate assemblages as biological indicators of water quality in the Moiben River, Kenya. *African Journal of Aquatic Science*, *34*(1), 15-26.
89. Masese, F. O., Raburu, P. O., & Kwena, F. (2012). Threats to the Nyando Wetland. *Community Based Approach to the Management of Nyando Wetland, Lake Victoria Basin, Kenya*, *68*.
90. Masese, F. O., Wanderi, E. W., Nyakeya, K., Achieng, A. O., Fouchy, K., & McClain, M. E. (2023). Bioassessment of multiple stressors in Afrotropical rivers: Evaluating the performance of a macroinvertebrate-based index of biotic integrity, diversity, and regional biotic indices. *Frontiers in Environmental Science*, *11*, 1015623.
91. Mashafi, C. A., Mabula, M., Semba, M., Ezekiel, C. N., Kashindye, B., Salehe, M. A., ... & Kimirei, I. A. (2024). The Impact of Land Use and Land Cover Change on Water Quality in Lake Victoria Catchment: A Case Study of Nkangabile River at Nyegezi Bay, Tanzania. *Tanzania Journal of Science*, *50*(3), 510-521.
92. Mati, B. M., Mutie, S., Gadain, H., Home, P., & Mtalo, F. (2008). Impacts of land‐use/cover changes on the hydrology of the transboundary Mara River, Kenya/Tanzania. *Lakes & Reservoirs: Research & Management*, *13*(2), 169-177.
93. Mawundu, S., Jacques, R. W., Liti, D. M., Ouko, J., Alfred, A., Evans, A., & Kaunda‐Arara, B. (2023). Influence of net cages on water quality and trophic status of Lake Victoria, Kenya: The case of Kadimu Bay. *Lakes & Reservoirs: Research & Management*, *28*(1), e12432.
94. Mbonde, A. S., Sitoki, L., & Kurmayer, R. (2015). Phytoplankton composition and microcystin concentrations in open and closed bays of Lake Victoria, Tanzania. *Aquatic ecosystem health & management*, *18*(2), 212-220.
95. Mboya, D. O., Manyala, J. O., & Ngugi, C. C. (2004). Fish introductions and their impact on the biodiversity and the fisheries of Lake Victoria.
96. Miruka, J. B., Getabu, A., Sitoki, L., James, O., Mwamburi, J., George, O., ... & Odoli, C. (2021). Water quality, phytoplankton composition and microcystin concentrations in Kisumu Bay (Kenya) of Lake Victoria after a prolonged water hyacinth infestation period. *Lakes & Reservoirs: Research & Management*, *26*(4), e12380.
97. Mugo, R., Waswa, R., Nyaga, J. W., Ndubi, A., Adams, E. C., & Flores-Anderson, A. I. (2020). Quantifying land use land cover changes in the Lake Victoria basin using satellite remote sensing: The trends and drivers between 1985 and 2014. *Remote Sensing*, *12*(17), 2829.
98. Muli, J. R. (1996). Environmental problems of Lake Victoria (East Africa): what the international community can do. *Lakes & Reservoirs: Research & Management*, *2*(1‐2), 47-53.
99. Muli, J. R. (2005). Spatial variation of benthic macroinvertebrates and the environmental factors influencing their distribution in Lake Victoria, Kenya. *Aquatic Ecosystem Health & Management*, *8*(2), 147-157.
100. Musamba, E. B., Ngaga, Y. M., Boon, E. K., & Giliba, R. A. (2011). Impact of socio-economic activities around Lake Victoria: Land use and land use changes in Musoma Municipality, Tanzania. *Journal of Human Ecology*, *35*(3), 143-154.
101. Muthoka, M., Ogello, E. O., Outa, N. O., Ouko, K. O., Obiero, K. O., Mboya, J. B., & Mukaburu, B. O. (2024). Threats to aquatic biodiversity and possible management strategies in Lake Victoria. *Aquaculture, Fish and Fisheries*, *4*(1), e143.
102. Muyodi, F. J., Bugenyi, F. W., & Hecky, R. E. (2010). Experiences and lessons learned from interventions in the Lake Victoria Basin: the Lake Victoria environmental management project. *Lakes & Reservoirs: Research & Management*, *15*(2), 77-88.
103. Muyodi, F. J., Hecky, R. E., Kitamirike, J. M., & Odong, R. (2009). Trends in health risks from water‐related diseases and cyanotoxins in Ugandan portion of Lake Victoria basin. *Lakes & Reservoirs: Research & Management*, *14*(3), 247-257.
104. Mwangi, H. M., Julich, S., Patil, S. D., McDonald, M. A., & Feger, K. H. (2016). Relative contribution of land use change and climate variability on discharge of upper Mara River, Kenya. *Journal of Hydrology: Regional Studies*, *5*, 244-260.
105. Nakangu, N. F., Masese, F. O., Barasa, J. E., Matolla, G. K., Riziki, J. W., & Mbalassa, M. (2023). Influence of the changing environment on food composition and condition factor in Labeo victorianus (Boulenger, 1901) in rivers of Lake Victoria Basin, Kenya. *Aquaculture and Fisheries*, *8*(2), 227-238.
106. Nakkazi, M. T., Nkwasa, A., Martínez, A. B., & Van Griensven, A. (2024). Linking land use and precipitation changes to water quality changes in Lake Victoria using earth observation data. *Environmental Monitoring and Assessment*, *196*(11), 1-27.
107. Nakkazi, M. T., Nkwasa, A., Martínez, A. B., & Van Griensven, A. (2024). Linking land use and precipitation changes to water quality changes in Lake Victoria using earth observation data. *Environmental Monitoring and Assessment*, *196*(11), 1-27.
108. Nantaba, F., Wasswa, J., Kylin, H., Palm, W. U., Bouwman, H., & Kümmerer, K. (2020). Occurrence, distribution, and ecotoxicological risk assessment of selected pharmaceutical compounds in water from Lake Victoria, Uganda. *Chemosphere*, *239*, 124642.
109. Nassali, J., Yongji, Z., & Fangninou, F. F. (2020). A systematic review of threats to the sustainable utilization of transboundary fresh water lakes: a case study of Lake Victoria. *International Journal of Scientific and Research Publications (IJSRP)*, *10*(02).
110. Natugonza, V., Musinguzi, L., Kishe, M. A., van Rijssel, J. C., Seehausen, O., & Ogutu-Ohwayo, R. (2021). The consequences of anthropogenic stressors on cichlid fish communities: revisiting Lakes Victoria, Kyoga, and Nabugabo. *The behavior, ecology and evolution of cichlid fishes*, 217-246.
111. Ngodhe, S. O., Raburu, P. O., & Achieng, A. (2014). The impact of water quality on species diversity and richness of macroinvertebrates in small water bodies in Lake Victoria Basin, Kenya. *Journal of Ecology and the Natural Environment*, *6*(1), 32-41.
112. Ngupula, G. W., Ezekiel, C. N., Kimirei, I. A., Mboni, E., & Kashindye, B. B. (2012). Physical and chemical characteristics of the Tanzanian inshore and offshore waters of Lake Victoria in 2005–2008. *African Journal of Aquatic Science*, *37*(3), 339-345.
113. Nimusiima, D., Byamugisha, D., Omara, T., & Ntambi, E. (2023). Physicochemical and microbial quality of water from the Ugandan stretch of the Kagera Transboundary River. *Limnological Review*, *23*(3), 157-176.
114. Njagi, D. M., Routh, J., Odhiambo, M., Luo, C., Basapuram, L. G., Olago, D., ... & Stager, C. (2022). A century of human-induced environmental changes and the combined roles of nutrients and land use in Lake Victoria catchment on eutrophication. *Science of the Total Environment*, *835*, 155425.
115. Njiru, J., van der Knaap, M., Kundu, R., & Nyamweya, C. (2018). Lake Victoria fisheries: Outlook and management. *Lakes & Reservoirs: Research & Management*, *23*(2), 152-162.
116. Njiru, M., Mkumbo, O. C., & van der Knaap, M. (2010). Some possible factors leading to decline in fish species in Lake Victoria. *Aquatic Ecosystem Health & Management*, *13*(1), 3-10.
117. Njiru, M., Van der Knaap, M., Taabu-Munyaho, A., Nyamweya, C. S., Kayanda, R. J., & Marshall, B. E. (2014). Management of Lake Victoria fishery: are we looking for easy solutions?. *Aquatic Ecosystem Health & Management*, *17*(1), 70-79.
118. Njiru, M., Waithaka, E., Muchiri, M., Van Knaap, M., & Cowx, I. G. (2005). Exotic introductions to the fishery of Lake Victoria: What are the management options?. *Lakes & Reservoirs: Research & Management*, *10*(3), 147-155.
119. Nkinda, M. S., Rwiza, M. J., Ijumba, J. N., & Njau, K. N. (2021). Heavy metals risk assessment of water and sediments collected from selected river tributaries of the Mara River in Tanzania. *Discover water*, *1*(1), 3.
120. Ntiba, M. J., Kudoja, W. M., & Mukasa, C. T. (2001). Management issues in the Lake Victoria watershed. *Lakes & Reservoirs: Research & Management*, *6*(3), 211-216.
121. Nyakeya, K., Masese, F. O., Gichana, Z., Nyamora, J. M., Getabu, A., Onchieku, J., ... & Nyakwama, R. (2022). Cage farming in the environmental mix of Lake Victoria: An analysis of its status, potential environmental and ecological effects, and a call for sustainability. *Aquatic Ecosystem Health & Management*, *25*(4), 37-52.
122. Nyamweya, C. S., Natugonza, V., Taabu-Munyaho, A., Aura, C. M., Njiru, J. M., Ongore, C., ... & Kayanda, R. (2020). A century of drastic change: Human-induced changes of Lake Victoria fisheries and ecology. *Fisheries Research*, *230*, 105564.
123. Nyamweya, C., Lawrence, T. J., Ajode, M. Z., Smith, S., Achieng, A. O., Barasa, J. E., ... & Nkalubo, W. (2023). Lake Victoria: Overview of research needs and the way forward. *Journal of Great Lakes Research*, *49*(6), 102211.
124. Nyboer, E. A., Liang, C., & Chapman, L. J. (2019). Assessing the vulnerability of Africa's freshwater fishes to climate change: A continent-wide trait-based analysis. *Biological Conservation*, *236*, 505-520.
125. Nyilitya, B., Mureithi, S., & Boeckx, P. (2020). Land use controls Kenyan riverine nitrate discharge into Lake Victoria–evidence from Nyando, Nzoia and Sondu Miriu river catchments. *Isotopes in Environmental and Health Studies*, *56*(2), 170-192.
126. Nyongesa, F., Odada, E. O., Olago, D. O., Ochola, W., Ntiba, M., Wandiga, S., ... & Oyieke, H. (2006). Water quality management of River Nzoia in Lake Victoria basin. In *Proceedings of the 11 th World Lakes Conference-- Proceedings* (Vol. 2, pp. 440-445).
127. O’Sullivan, J. J., Lupakisyo Mwalwiba, G., Purcell, P. J., Turner, J. N., & Mtalo, F. (2016). Assessing sediment and water quality issues in expanding African wetlands: the case of the Mara River, Tanzania. *International Journal of Environmental Studies*, *73*(1), 95-107.
128. Ochola, W. O. (2006). Land cover, land use change and related issues in the Lake Victoria basin: States, drivers, future trends and impacts on environment and human livelihoods. *United Nation Environment Program*.
129. Odada, E. O., Ochola, W. O., & Olago, D. O. (2009). Drivers of ecosystem change and their impacts on human well‐being in Lake Victoria basin. *African Journal of Ecology*, *47*, 46-54.
130. Odada, E. O., Olago, D. O., Bugenyi, F., Kulindwa, K., Karimumuryango, J., West, K., ... & Achola, P. (2003). Environmental assessment of the east African rift valley lakes. *Aquatic sciences*, *65*, 254-271.
131. Odada, E. O., Olago, D. O., Kulindwa, K., Ntiba, M., & Wandiga, S. (2004). Mitigation of environmental problems in Lake Victoria, East Africa: causal chain and policy options analyses. *Ambio: A journal of the human environment*, *33*(1), 13-23.
132. Odongtoo, G., Ssebugwawo, D., & Lating, P. O. (2020). Factors affecting the development of effective water resource management policies: The case of the management of Lake Victoria Basin in Uganda.
133. Ogello, O. E., Kevin, O. B. I. E. R. O., & Mbonge, M. J. (2013). Lake Victoria and the common property debate: is the tragedy of the commons a threat to its future?.
134. Oguttu, H., Bugenyi, F. W., Leuenberger, H., Wolf, M., & Bachofen, R. (2008). Pollution menacing Lake Victoria: quantification of point sources around Jinja Town, Uganda. *Water Sa*, *34*(1), 89-98.
135. Ogutu‐Ohwayo, R., & Balirwa, J. S. (2006). Management challenges of freshwater fisheries in Africa. *Lakes & Reservoirs: Research & Management*, *11*(4), 215-226.
136. Ogutu-Ohwayo, R., Hecky, R. E., Cohen, A. S., & Kaufman, L. (1997). Human impacts on the African great lakes. *Environmental Biology of Fishes*, *50*, 117-131.
137. Ogutu-Ohwayo, R., Natugonza, V., Musinguzi, L., Olokotum, M., & Naigaga, S. (2016). Implications of climate variability and change for African lake ecosystems, fisheries productivity, and livelihoods. *Journal of Great Lakes Research*, *42*(3), 498-510.
138. Ojwang, W. O., Kaufman, L., Soule, E., & Asila, A. A. (2007). Evidence of stenotopy and anthropogenic influence on carbon source for two major riverine fishes of the Lake Victoria watershed. *Journal of Fish Biology*, *70*(5), 1430-1446.
139. Okechi, J. K. (2022). *An ecosystem-based approach to balancing cage aquaculture, capture fisheries, and biodiversity conservation in Lake Victoria, Kenya* (Doctoral dissertation, Boston University).
140. Okechi, J. K., Peoples, N., Nyamweya, C. S., Glaser, S., & Kaufman, L. (2022). The ecological health of Lake Victoria (Kenya) in the face of growing cage aquaculture. *Conservation Science and Practice*, *4*(11), e12826.
141. Okungu, J. O., Njoka, S., Abuodha, J. O. Z., & Hecky, R. E. (2005). An introduction to Lake Victoria catchment, water quality, physical limnology and ecosystem status (Kenyan sector). *Frontiers Media SA*, *5*.
142. Olang, L. O., & Kundu, P. M. (2011). Land degradation of the Mau forest complex in Eastern Africa: a review for management and restoration planning. *Environmental Monitoring*, *15*, 245-262.
143. Ong, C., & Orego, F. (2002). Links between land management, sedimentation, nutrient flows and smallholder irrigation in the Lake Victoria Basin. *The Changing Face of Irrigation in Kenya: Opportunities for Anticipating Change in Eastern and Southern Africa. International Water Management Institute, Colombo, Sri Lanka*, 135-154.
144. Ongore, C. O., Aura, C. M., Ogari, Z., Njiru, J. M., & Nyamweya, C. S. (2018). Spatial-temporal dynamics of water hyacinth, Eichhornia crassipes (Mart.) and other macrophytes and their impact on fisheries in Lake Victoria, Kenya. *Journal of Great Lakes Research*, *44*(6), 1273-1280.
145. Onyango, D. O., & Opiyo, S. B. (2021). Riparian community perceptions of the extent and potential impacts of watershed degradation in Lake Victoria Basin, Kenya. *Limnologica*, *91*, 125930.
146. Onyango, D. O., Ikporukpo, C. O., Taiwo, J. O., & Opiyo, S. B. (2021). Land use and land cover change as an indicator of watershed urban development in the Kenyan Lake Victoria Basin. *International Journal of Sustainable Development and Planning*, *16*(2), 335-345.
147. Onyango, D. O., Ikporukpo, C. O., Taiwo, J. O., Opiyo, S. B., & Otieno, K. O. (2021). Comparative analysis of land use/land cover change and watershed urbanization in the lakeside counties of the Kenyan Lake victoria basin using remote sensing and GIS techniques. *Adv. sci. technol. eng. syst. j*, *6*(2), 671-688.
148. Orina, P. S., Onyango, D. M., Lungayia, H., Oduor, A., Sifuna, A. W., Otuya, P., ... & Hinzano, S. M. (2020). Water quality of selected fishing beaches of Lake Victoria Kenyan gulf. *Open Journal of Ecology*, *10*(01), 22.
149. Ouma, S. O., Ngeranwa, J. N., Juma, K. K., & Mburu, D. N. (2016). Seasonal variation of the physicochemical and bacteriological quality of water from five rural catchment areas of lake victoria basin in Kenya. *Journal of Environmental Analytical Chemistry*, *3*(170), 2.
150. Outa, N. O., Yongo, E. O., Keyombe, J. L. A., Ogello, E. O., & Namwaya Wanjala, D. (2020). A review on the status of some major fish species in Lake Victoria and possible conservation strategies. *Lakes & Reservoirs: Research & Management*, *25*(1), 105-111.
151. Owino, A. O., & Ryan, P. G. (2007). Recent papyrus swamp habitat loss and conservation implications in western Kenya. *Wetlands Ecology and management*, *15*, 1-12.
152. Oyege, I., Katwesigye, R., Kiwanuka, M., Mutanda, H. E., Niyomukiza, J. B., Kataraihya, D. J., ... & Egor, M. (2024). Temporal trends of water quality parameters, heavy metals, microplastics, and emerging organic pollutants in Lake Victoria and its basin: Knowns, gaps, and future direction. *Environmental Nanotechnology, Monitoring & Management*, 100962.
153. Pringle, R. M. (2005). The Nile perch in Lake Victoria: local responses and adaptations. *Africa*, *75*(4), 510-538.
154. Raburu, P. O., & Masese, F. O. (2012). Development of a fish‐based index of biotic integrity (FIBI) for monitoring riverine ecosystems in the Lake Victoria drainage Basin, Kenya. *River Research and Applications*, *28*(1), 23-38.
155. Raburu, P. O., & Owuor, J. B. (2002). Impact of agro-industrial activities on the water quality of River Nyando, Lake Victoria Basin, Kenya.
156. Raburu, P. O., Masese, F. O., & Mulanda, C. A. (2009a). Macroinvertebrate Index of Biotic Integrity (M-IBI) for monitoring rivers in the upper catchment of Lake Victoria Basin, Kenya. *Aquatic Ecosystem Health & Management*, *12*(2), 197-205.
157. Raburu, P. O., Okeyo-Owuor, J. B., & Masese, F. O. (2009b). Macroinvertebrate-based index of biotic integrity (M-IBI) for monitoring the Nyando River, Lake Victoria Basin, Kenya. *Scientific Research and Essays*, *4*(12), 1468-1477.
158. Richards, N., Anderson, E. P., Rouillé-Kielo, G., McClain, M., & Mombo, F. (2023). 9 From the Mau Forest to Lake Victoria: The Journey of the Mara River in East Africa. *River Culture: Life as a dance to the rhythm of the waters*, 191.
159. Roegner, A. F., Corman, J. R., Sitoki, L. M., Kwena, Z. A., Ogari, Z., Miruka, J. B., ... & Miller, T. R. (2023). Impacts of algal blooms and microcystins in fish on small-scale fishers in Winam Gulf, Lake Victoria: implications for health and livelihood. *Ecology and society: a journal of integrative science for resilience and sustainability*, *28*(1), 49.
160. Rosette, Z. L., Nina, P. M., Bakaki, F., & Munir, A. Y. M. (2020). The influence of water quality parameters on fish species abundance and distribution near shoreline of Lake Victoria. *Afr J Environ Nat Sci Res*, *3*(2), 1-12.
161. Sayer, C. A., Carr, J. A., & Darwall, W. R. (2019). A critical sites network for freshwater biodiversity in the Lake Victoria Basin. *Fisheries Management and Ecology*, *26*(5), 435-443.
162. Sayer, C. A., Carr, J. A., & Whitney, C. W. (2018). The status and distribution of freshwater plants in the Lake Victoria Basin. *Freshwater biodiversity in the Lake Victoria Basin: Guidance for species conservation, site protection, climate resilience and sustainable livelihoods. Cambridge, UK and Gland, Switzerland, IUCN*, 99-109.
163. Sayer, C. A., Máiz-Tomé, L., & Darwall, W. R. (Eds.). (2018). *Freshwater biodiversity in the Lake Victoria Basin: Guidance for species conservation, site protection, climate resilience and sustainable livelihoods*. Cambridge, Gland: International Union for Conservation of Nature.
164. Scheren, P. A. G. M., Zanting, H. A., & Lemmens, A. M. C. (2000). Estimation of water pollution sources in Lake Victoria, East Africa: application and elaboration of the rapid assessment methodology. *Journal of environmental management*, *58*(4), 235-248.
165. Scheren, P. A., Bosboom, J. C., Njau, K. K., & Lemmens, A. M. (1995). Assessment of water pollution in the catchment area of Lake Victoria, Tanzania. *Journal of Eastern African Research & Development*, 129-143.
166. Schuyt, K. D. (2005). Economic consequences of wetland degradation for local populations in Africa. *Ecological economics*, *53*(2), 177-190.
167. Sekiranda, S. B. K., Okot-Okumu, J., Bugenyi, F. W. B., Ndawula, L. M., & Gandhi, P. (2004). Variation in composition of macro-benthic invertebrates as an indication of water quality status in three bays in Lake Victoria. *Uganda Journal of Agricultural Sciences*, *9*(1), 396-411.
168. Semalulu, O., Hecky, R. E., & Muir, D. (2005). Agricultural chemicals and metal contaminants in the Ugandan catchment of Lake Victoria. *Water quality and quantity synthesis final report, LVEMP*, 162-177.
169. Shepherd, K., Walsh, M., Mugo, F., Ong, C., Svan-Hansen, T., Swallow, B., ... & Mungai, D. (2000). Improved land management in the Lake Victoria Basin: Linking land and lake, research and extension, catchment and lake basin. *International Centre for Research in Agroforestry*.
170. Shinhu, R. J., Amasi, A. I., Wynants, M., Nobert, J., Mtei, K. M., & Njau, K. N. (2023). Assessing the impacts of land use and climate changes on river discharge towards Lake Victoria. *Earth*, *4*(2), 365-383.
171. Simiyu, B. M., Amukhuma, H. S., Sitoki, L., Okello, W., & Kurmayer, R. (2022). Interannual variability of water quality conditions in the Nyanza Gulf of Lake Victoria, Kenya. *Journal of Great Lakes Research*, *48*(1), 97-109.
172. Sitati, A., Raburu, P. O., Yegon, M. J., & Masese, F. O. (2021). Land-use influence on the functional organization of Afrotropical macroinvertebrate assemblages. *Limnologica*, *88*, 125875.
173. Sitoki, L., Gichuki, J., Ezekiel, C., Wanda, F., Mkumbo, O. C., & Marshall, B. E. (2010). The environment of Lake Victoria (East Africa): current status and historical changes. *International Review of Hydrobiology*, *95*(3), 209-223.
174. Swallow, B. M., Sang, J. K., Nyabenge, M., Bundotich, D. K., Duraiappah, A. K., & Yatich, T. B. (2009). Tradeoffs, synergies and traps among ecosystem services in the Lake Victoria basin of East Africa. *Environmental science & policy*, *12*(4), 504-519.
175. Taabu-Munyaho, A., Marshall, B. E., Tomasson, T., & Marteinsdottir, G. (2016). Nile perch and the transformation of Lake Victoria. *African Journal of Aquatic Science*, *41*(2), 127-142.
176. Thenya, T., Wassmann, R., Verchot, L., Mungai, D., Odada, E. O., Olago, D. O., ... & Oyieke, H. (2006). Degradation of the riparian wetlands in the Lake Victoria basin- Yala swamp case study. In *Proceedings of the 11 th World Lakes Conference-- Proceedings* (Vol. 2, pp. 483-494).
177. Triest, L., Lung’ayia, H., Ndiritu, G., & Beyene, A. (2012). Epilithic diatoms as indicators in tropical African rivers (Lake Victoria catchment). *Hydrobiologia*, *695*, 343-360.
178. Twesigye, C. K., Onywere, S. M., Getenga, Z. M., Mwakalila, S. S., & Nakiranda, J. K. (2011). The impact of land use activities on vegetation cover and water quality in the Lake Victoria watershed.
179. van den Broek, K. L. (2019). Stakeholders' perceptions of the socio‐economic and environmental challenges at Lake Victoria. *Lakes & Reservoirs: Research & Management*, *24*(3), 239-245.
180. van Soesbergen, A., Sassen, M., Kimsey, S., & Hill, S. (2019). Potential impacts of agricultural development on freshwater biodiversity in the Lake Victoria basin. *Aquatic conservation: marine and freshwater ecosystems*, *29*(7), 1052-1062.
181. van Zwieten, P. A., Kolding, J., Plank, M. J., Hecky, R. E., Bridgeman, T. B., MacIntyre, S., ... & Silsbe, G. M. (2016). The Nile perch invasion in Lake Victoria: cause or consequence of the haplochromine decline?. *Canadian journal of fisheries and aquatic sciences*, *73*(4), 622-643.
182. Verschuren, D., Johnson, T. C., Kling, H. J., Edgington, D. N., Leavitt, P. R., Brown, E. T., ... & Hecky, R. E. (2002). History and timing of human impact on Lake Victoria, East Africa. *Proceedings of the Royal Society of London. Series B: Biological Sciences*, *269*(1488), 289-294.
183. Vincent, K., Mwebaza‐Ndawula, L., Makanga, B., & Nachuha, S. (2012). Variations in zooplankton community structure and water quality conditions in three habitat types in northern Lake Victoria. *Lakes & Reservoirs: Research & Management*, *17*(2), 83-95.
184. Wenaty, A., Mabiki, F., Chove, B., & Mdegela, R. (2019). Assessment of persistent organochlorine compounds contamination on the Lake Victoria water and sediments: a case study in Tanzania. *African Journal of Aquatic Science*, *44*(3), 281-290.
185. Wang, H., Wang, T., Toure, B., & Li, F. (2012). Protect Lake Victoria through green economy, public participation and good governance.
186. Wasige, J. E., Groen, T. A., Smaling, E., & Jetten, V. (2013). Monitoring basin-scale land cover changes in Kagera Basin of Lake Victoria using ancillary data and remote sensing. *International Journal of Applied Earth Observation and Geoinformation*, *21*, 32-42.
187. Wasswa, J., Kiremire, B. T., Nkedi-Kizza, P., Mbabazi, J., & Ssebugere, P. (2011). Organochlorine pesticide residues in sediments from the Uganda side of Lake Victoria. *Chemosphere*, *82*(1), 130-136.
188. Witte, F., Wanink, J. H., Rutjes, H. A., Van der Meer, H. J., & Van Den Thillart, G. E. E. J. M. (2005). Eutrophication and its influences on the fish fauna of Lake Victoria. In *Restoration and management of tropical eutrophic lakes* (pp. 301-338). CRC Press.
189. Yegon, M. J., Masese, F. O., Sitati, A., & Graf, W. (2021). Elevation and land use as drivers of macroinvertebrate functional composition in Afromontane headwater streams. *Marine and Freshwater Research*.
190. Yunana, D. A., Shittu, A. A., Ayuba, S., Bassah, E. J., & Joshua, W. K. (2017). Climate change and lake water resources in Sub-Saharan Africa: case study of lake Chad and lake Victoria. *Nigerian Journal of Technology*, *36*(2), 648-654.
